# Supplementary material for: The isomeric effect on the adjacent Si dimer didechlorination of trans and iso-dichloroethylene on Si(100)-2×1
Source: Royal Society of Chemistry journal article supplement (doi:10.1039/c0cp01506g), 2011-01-01
Supplement: c0cp01506g.pdf [file c0cp01506g.pdf]

## Supporting Information

### **The Isomeric Effect on the Adjacent Si Dimer Didechlorination of *trans* and *iso*-Dichloroethylene on Si(100)-2 × 1**

Qiuju Zhang, Bo Li, Qinghong Yuan, Baihai Li, Zhifeng Liu, and Liang Chen

**[1] Atomic coordinates and electronic energies of adsorption structures for *trans*-DCE single and double dechlorination on Si(100)**

**[2] Atomic coordinates and electronic energies of adsorption structures for *iso*-DCE single and double dechlorination on Si(100)**

**[3] Imaginary vibrational frequencies of the transition states along single and double dechlorination processes of *trans* and *iso*-DCE dissociation on Si(100)**

**[1] The Cartesian coordinates and electronic energies (GGA-PW91) of adsorption structures for single and double dechlorination of *trans*-DCE on Si(100) using  $p(2\times 2)$  unit cell and  $(4\times 2)$  supercell.**

**mono- $\sigma^A$  ( E= -161.839052 eV)**

|    |             |             |              |
|----|-------------|-------------|--------------|
| C  | 0.266050000 | 0.944100000 | 8.069500000  |
| C  | 7.642670000 | 1.981510000 | 8.844420000  |
| H  | 0.390100000 | 7.649400000 | 8.521070000  |
| H  | 7.522840000 | 3.005080000 | 8.488980000  |
| H  | 0.000000000 | 0.000000000 | 0.000000000  |
| H  | 0.000000000 | 2.280000000 | 0.000000000  |
| H  | 0.000000000 | 3.847000000 | 0.000000000  |
| H  | 0.000000000 | 6.127000000 | 0.000000000  |
| H  | 3.847000000 | 0.000000000 | 0.000000000  |
| H  | 3.847000000 | 2.280000000 | 0.000000000  |
| H  | 3.847000000 | 3.847000000 | 0.000000000  |
| H  | 3.847000000 | 6.127000000 | 0.000000000  |
| Si | 0.000000000 | 1.140000000 | 0.930000000  |
| Si | 0.000000000 | 4.987000000 | 0.930000000  |
| Si | 3.847000000 | 1.140000000 | 0.930000000  |
| Si | 3.847000000 | 4.987000000 | 0.930000000  |
| Si | 1.929540000 | 1.102730000 | 2.191590000  |
| Si | 1.919690000 | 4.943990000 | 2.221690000  |
| Si | 5.778170000 | 1.104030000 | 2.330510000  |
| Si | 5.773010000 | 4.946900000 | 2.319250000  |
| Si | 1.891420000 | 3.001190000 | 3.535180000  |
| Si | 1.896330000 | 6.881980000 | 3.515080000  |
| Si | 5.809640000 | 3.026680000 | 3.745870000  |
| Si | 5.812520000 | 6.857300000 | 3.732630000  |
| Si | 0.111740000 | 3.058290000 | 5.071020000  |
| Si | 0.117810000 | 6.818870000 | 5.039990000  |
| Si | 3.778940000 | 2.962010000 | 4.989690000  |
| Si | 3.778370000 | 6.878640000 | 4.965720000  |
| Si | 0.661510000 | 1.077870000 | 6.254220000  |
| Si | 0.563360000 | 4.950410000 | 6.464700000  |
| Si | 3.083160000 | 1.060290000 | 6.196190000  |
| Si | 2.769130000 | 4.921770000 | 5.750540000  |
| Cl | 3.883710000 | 1.027390000 | 8.123530000  |
| Cl | 7.402830000 | 1.856010000 | 10.558370000 |

**mono- $\sigma^B$  ( E= -161.810237 eV)**

|   |             |             |             |
|---|-------------|-------------|-------------|
| C | 3.430020000 | 1.953820000 | 8.972660000 |
| C | 3.557440000 | 0.952950000 | 8.099160000 |

|    |             |             |              |
|----|-------------|-------------|--------------|
| H  | 3.083200000 | 2.955260000 | 8.718940000  |
| H  | 3.903300000 | 7.674970000 | 8.459530000  |
| H  | 0.000000000 | 0.000000000 | 0.000000000  |
| H  | 0.000000000 | 2.280000000 | 0.000000000  |
| H  | 0.000000000 | 3.847000000 | 0.000000000  |
| H  | 0.000000000 | 6.127000000 | 0.000000000  |
| H  | 3.847000000 | 0.000000000 | 0.000000000  |
| H  | 3.847000000 | 2.280000000 | 0.000000000  |
| H  | 3.847000000 | 3.847000000 | 0.000000000  |
| H  | 3.847000000 | 6.127000000 | 0.000000000  |
| Si | 0.000000000 | 1.140000000 | 0.930000000  |
| Si | 0.000000000 | 4.987000000 | 0.930000000  |
| Si | 3.847000000 | 1.140000000 | 0.930000000  |
| Si | 3.847000000 | 4.987000000 | 0.930000000  |
| Si | 1.928070000 | 1.102860000 | 2.193080000  |
| Si | 1.921120000 | 4.948020000 | 2.225330000  |
| Si | 5.767880000 | 1.109170000 | 2.335650000  |
| Si | 5.752900000 | 4.954640000 | 2.325660000  |
| Si | 1.876520000 | 3.002330000 | 3.535210000  |
| Si | 1.869450000 | 6.885520000 | 3.524840000  |
| Si | 5.750680000 | 3.032000000 | 3.751790000  |
| Si | 5.750360000 | 6.864900000 | 3.746800000  |
| Si | 0.067840000 | 3.074360000 | 5.029950000  |
| Si | 0.065320000 | 6.783550000 | 5.026920000  |
| Si | 3.727540000 | 2.951930000 | 5.040380000  |
| Si | 3.719030000 | 6.912120000 | 5.015280000  |
| Si | 0.591550000 | 1.076870000 | 6.177010000  |
| Si | 0.510030000 | 4.928900000 | 6.476830000  |
| Si | 3.023820000 | 1.071960000 | 6.311300000  |
| Si | 2.714930000 | 4.930910000 | 5.754170000  |
| Cl | 3.787400000 | 1.809390000 | 10.662490000 |
| Cl | 7.468330000 | 1.073510000 | 8.102860000  |

**di- $\sigma$  ( E= -289.909267 eV)**

|   |             |             |             |
|---|-------------|-------------|-------------|
| C | 1.141330000 | 5.154510000 | 8.043010000 |
| C | 2.674770000 | 4.987090000 | 8.031840000 |
| H | 0.875130000 | 6.176570000 | 8.342250000 |
| H | 2.965070000 | 4.020610000 | 8.461250000 |
| H | 0.000000000 | 0.000000000 | 0.000000000 |
| H | 0.000000000 | 2.280000000 | 0.000000000 |
| H | 0.000000000 | 3.847000000 | 0.000000000 |
| H | 0.000000000 | 6.127000000 | 0.000000000 |
| H | 3.847000000 | 0.000000000 | 0.000000000 |
| H | 3.847000000 | 2.280000000 | 0.000000000 |

|    |             |              |             |
|----|-------------|--------------|-------------|
| H  | 3.847000000 | 3.847000000  | 0.000000000 |
| H  | 3.847000000 | 6.127000000  | 0.000000000 |
| H  | 0.000000000 | 7.701000000  | 0.000000000 |
| H  | 0.000000000 | 9.981000000  | 0.000000000 |
| H  | 3.847000000 | 7.701000000  | 0.000000000 |
| H  | 3.847000000 | 9.981000000  | 0.000000000 |
| H  | 0.000000000 | 11.548000000 | 0.000000000 |
| H  | 0.000000000 | 13.828000000 | 0.000000000 |
| H  | 3.847000000 | 11.548000000 | 0.000000000 |
| H  | 3.847000000 | 13.828000000 | 0.000000000 |
| Si | 0.000000000 | 1.140000000  | 0.930000000 |
| Si | 0.000000000 | 4.987000000  | 0.930000000 |
| Si | 3.847000000 | 1.140000000  | 0.930000000 |
| Si | 3.847000000 | 4.987000000  | 0.930000000 |
| Si | 0.000000000 | 8.820000000  | 0.930000000 |
| Si | 0.000000000 | 12.667000000 | 0.930000000 |
| Si | 3.847000000 | 8.820000000  | 0.930000000 |
| Si | 3.847000000 | 12.667000000 | 0.930000000 |
| Si | 1.918280000 | 1.141030000  | 2.215930000 |
| Si | 1.927670000 | 4.976500000  | 2.215530000 |
| Si | 5.764090000 | 1.119720000  | 2.328390000 |
| Si | 5.776610000 | 4.975690000  | 2.343320000 |
| Si | 1.890300000 | 3.057000000  | 3.556390000 |
| Si | 1.888590000 | 6.897020000  | 3.541110000 |
| Si | 5.800430000 | 3.029400000  | 3.749880000 |
| Si | 5.797880000 | 6.922960000  | 3.740710000 |
| Si | 0.093180000 | 2.940000000  | 5.080230000 |
| Si | 0.092180000 | 6.988630000  | 5.055940000 |
| Si | 3.783460000 | 3.062410000  | 5.014260000 |
| Si | 3.778630000 | 6.914580000  | 4.995270000 |
| Si | 0.576970000 | 1.102850000  | 6.545310000 |
| Si | 0.674120000 | 4.968400000  | 6.138930000 |
| Si | 2.791900000 | 1.084640000  | 5.780630000 |
| Si | 3.031760000 | 4.999740000  | 6.113470000 |
| Si | 1.916980000 | 8.812760000  | 2.212480000 |
| Si | 5.763000000 | 8.832990000  | 2.327120000 |
| Si | 1.917250000 | 10.736640000 | 3.546840000 |
| Si | 5.761830000 | 10.741300000 | 3.776400000 |
| Si | 0.083800000 | 10.627010000 | 5.068910000 |
| Si | 3.745320000 | 10.868650000 | 5.079470000 |
| Si | 0.559530000 | 8.810150000  | 6.552730000 |
| Si | 2.788820000 | 8.866510000  | 5.809970000 |
| Si | 1.933490000 | 12.659820000 | 2.209850000 |
| Si | 5.776630000 | 12.661850000 | 2.344650000 |

|    |             |              |             |
|----|-------------|--------------|-------------|
| Si | 1.923700000 | 14.590830000 | 3.526290000 |
| Si | 5.768650000 | 14.589470000 | 3.763010000 |
| Si | 0.096670000 | 14.687310000 | 5.045990000 |
| Si | 3.749170000 | 14.470000000 | 5.056110000 |
| Si | 1.001780000 | 12.657360000 | 5.783290000 |
| Si | 3.233430000 | 12.677980000 | 6.559390000 |
| Cl | 0.308290000 | 4.069950000  | 9.222830000 |
| Cl | 3.544130000 | 6.243950000  | 9.000440000 |

**end-bridge ( E = -289.793100 eV)**

|    |              |             |             |
|----|--------------|-------------|-------------|
| C  | 8.009450000  | 2.341460000 | 7.889120000 |
| C  | 8.273790000  | 3.877880000 | 7.916220000 |
| H  | 8.449820000  | 1.904060000 | 8.794340000 |
| H  | 7.527460000  | 4.341480000 | 8.574210000 |
| H  | 7.694000000  | 0.000000000 | 0.000000000 |
| H  | 7.694000000  | 2.280000000 | 0.000000000 |
| H  | 7.694000000  | 3.847000000 | 0.000000000 |
| H  | 7.694000000  | 6.127000000 | 0.000000000 |
| H  | 11.541000000 | 0.000000000 | 0.000000000 |
| H  | 11.541000000 | 2.280000000 | 0.000000000 |
| H  | 11.541000000 | 3.847000000 | 0.000000000 |
| H  | 11.541000000 | 6.127000000 | 0.000000000 |
| H  | 3.854000000  | 0.000000000 | 0.000000000 |
| H  | 3.854000000  | 2.280000000 | 0.000000000 |
| H  | 3.854000000  | 3.847000000 | 0.000000000 |
| H  | 3.854000000  | 6.127000000 | 0.000000000 |
| H  | 0.014000000  | 0.000000000 | 0.000000000 |
| H  | 0.014000000  | 2.280000000 | 0.000000000 |
| H  | 0.014000000  | 3.847000000 | 0.000000000 |
| H  | 0.014000000  | 6.127000000 | 0.000000000 |
| Si | 11.541000000 | 1.140000000 | 0.930000000 |
| Si | 11.541000000 | 4.987000000 | 0.930000000 |
| Si | 3.854000000  | 1.140000000 | 0.930000000 |
| Si | 3.854000000  | 4.987000000 | 0.930000000 |
| Si | 7.701000000  | 1.140000000 | 0.930000000 |
| Si | 7.701000000  | 4.987000000 | 0.930000000 |
| Si | 0.014000000  | 1.140000000 | 0.930000000 |
| Si | 0.014000000  | 4.987000000 | 0.930000000 |
| Si | 9.627910000  | 1.082090000 | 2.235760000 |
| Si | 9.615910000  | 5.022880000 | 2.214720000 |
| Si | 13.487150000 | 1.126810000 | 2.323130000 |
| Si | 13.466340000 | 4.981270000 | 2.318190000 |
| Si | 9.676250000  | 3.066810000 | 3.447470000 |
| Si | 9.563320000  | 6.874890000 | 3.680840000 |

|    |              |             |             |
|----|--------------|-------------|-------------|
| Si | 13.500060000 | 3.056220000 | 3.721230000 |
| Si | 13.477570000 | 6.896030000 | 3.747950000 |
| Si | 7.790940000  | 3.021760000 | 4.783620000 |
| Si | 7.758750000  | 6.977560000 | 5.289850000 |
| Si | 11.497490000 | 2.921520000 | 4.979530000 |
| Si | 11.492200000 | 7.044100000 | 5.079720000 |
| Si | 8.594410000  | 1.378310000 | 6.270710000 |
| Si | 8.382170000  | 4.799760000 | 6.169180000 |
| Si | 11.012990000 | 1.186080000 | 6.539190000 |
| Si | 10.736220000 | 4.962680000 | 5.779380000 |
| Si | 5.773030000  | 1.109120000 | 2.323810000 |
| Si | 5.769290000  | 5.009870000 | 2.350130000 |
| Si | 5.720190000  | 3.042200000 | 3.687600000 |
| Si | 5.795910000  | 6.924870000 | 3.831260000 |
| Si | 3.762500000  | 2.930600000 | 5.065760000 |
| Si | 3.751690000  | 7.020470000 | 5.068010000 |
| Si | 3.208800000  | 1.129100000 | 6.553900000 |
| Si | 2.859260000  | 4.973920000 | 5.774850000 |
| Si | 1.943580000  | 1.130850000 | 2.210960000 |
| Si | 1.926310000  | 4.976030000 | 2.211430000 |
| Si | 1.937880000  | 3.051810000 | 3.541700000 |
| Si | 1.932640000  | 6.899870000 | 3.539770000 |
| Si | 0.099180000  | 3.162340000 | 5.042840000 |
| Si | 0.094600000  | 6.774020000 | 5.049300000 |
| Si | 0.984560000  | 1.120120000 | 5.763580000 |
| Si | 0.623030000  | 4.965270000 | 6.540790000 |
| Cl | 6.209580000  | 2.086770000 | 8.052070000 |
| Cl | 9.876070000  | 4.186250000 | 8.752650000 |

**intra dimer tetra- $\sigma$  ( E = -292.940196 eV)**

|   |             |             |             |
|---|-------------|-------------|-------------|
| C | 1.227000000 | 5.017200000 | 7.953000000 |
| C | 2.580460000 | 4.972740000 | 7.954610000 |
| H | 0.618350000 | 5.058990000 | 8.861100000 |
| H | 3.197590000 | 4.961030000 | 8.857210000 |
| H | 0.000000000 | 0.000000000 | 0.000000000 |
| H | 0.000000000 | 2.280000000 | 0.000000000 |
| H | 0.000000000 | 3.847000000 | 0.000000000 |
| H | 0.000000000 | 6.127000000 | 0.000000000 |
| H | 3.847000000 | 0.000000000 | 0.000000000 |
| H | 3.847000000 | 2.280000000 | 0.000000000 |
| H | 3.847000000 | 3.847000000 | 0.000000000 |
| H | 3.847000000 | 6.127000000 | 0.000000000 |
| H | 0.000000000 | 7.701000000 | 0.000000000 |
| H | 0.000000000 | 9.981000000 | 0.000000000 |

|    |             |              |             |
|----|-------------|--------------|-------------|
| H  | 3.847000000 | 7.701000000  | 0.000000000 |
| H  | 3.847000000 | 9.981000000  | 0.000000000 |
| H  | 0.000000000 | 11.548000000 | 0.000000000 |
| H  | 0.000000000 | 13.828000000 | 0.000000000 |
| H  | 3.847000000 | 11.548000000 | 0.000000000 |
| H  | 3.847000000 | 13.828000000 | 0.000000000 |
| Si | 0.000000000 | 1.140000000  | 0.930000000 |
| Si | 0.000000000 | 4.987000000  | 0.930000000 |
| Si | 3.847000000 | 1.140000000  | 0.930000000 |
| Si | 3.847000000 | 4.987000000  | 0.930000000 |
| Si | 0.000000000 | 8.820000000  | 0.930000000 |
| Si | 0.000000000 | 12.667000000 | 0.930000000 |
| Si | 3.847000000 | 8.820000000  | 0.930000000 |
| Si | 3.847000000 | 12.667000000 | 0.930000000 |
| Si | 1.923340000 | 1.162040000  | 2.205840000 |
| Si | 1.924410000 | 5.020230000  | 2.229740000 |
| Si | 5.766600000 | 1.121200000  | 2.315390000 |
| Si | 5.775590000 | 5.016220000  | 2.321080000 |
| Si | 1.904820000 | 3.067350000  | 3.540600000 |
| Si | 1.904850000 | 6.940020000  | 3.562980000 |
| Si | 5.786630000 | 3.058620000  | 3.679860000 |
| Si | 5.785720000 | 6.936680000  | 3.750100000 |
| Si | 0.050450000 | 3.078310000  | 5.009570000 |
| Si | 0.082710000 | 7.042550000  | 5.048390000 |
| Si | 3.814050000 | 3.090920000  | 4.977070000 |
| Si | 3.767570000 | 6.951950000  | 5.004930000 |
| Si | 0.678720000 | 1.133630000  | 6.178870000 |
| Si | 0.702560000 | 5.044060000  | 6.123250000 |
| Si | 3.047190000 | 1.080450000  | 5.821740000 |
| Si | 3.070250000 | 5.006490000  | 6.123340000 |
| Si | 1.916300000 | 8.834140000  | 2.209400000 |
| Si | 5.764960000 | 8.836040000  | 2.325420000 |
| Si | 1.930270000 | 10.749370000 | 3.568470000 |
| Si | 5.760670000 | 10.734490000 | 3.790980000 |
| Si | 0.079590000 | 10.578190000 | 5.086800000 |
| Si | 3.730540000 | 10.763640000 | 5.064120000 |
| Si | 0.615280000 | 8.802680000  | 6.574190000 |
| Si | 3.046190000 | 8.825990000  | 6.253340000 |
| Si | 1.932410000 | 12.675270000 | 2.239440000 |
| Si | 5.775600000 | 12.634520000 | 2.333070000 |
| Si | 1.933740000 | 14.648950000 | 3.553320000 |
| Si | 5.761190000 | 14.571040000 | 3.715850000 |
| Si | 0.055480000 | 14.579520000 | 5.010500000 |
| Si | 3.797700000 | 14.421670000 | 5.065550000 |

|    |             |              |             |
|----|-------------|--------------|-------------|
| Si | 1.023190000 | 12.586650000 | 5.772410000 |
| Si | 3.252530000 | 12.612020000 | 6.505640000 |
| Cl | 0.122000000 | 1.170760000  | 8.192040000 |
| Cl | 4.032800000 | 8.781930000  | 8.113470000 |

**inter dimer tetra- $\sigma_1$  ( E = -292.936973 eV )**

|    |              |             |             |
|----|--------------|-------------|-------------|
| C  | 7.934040000  | 2.357530000 | 7.820440000 |
| C  | 7.938870000  | 3.716760000 | 7.838260000 |
| H  | 7.755870000  | 1.836420000 | 8.767830000 |
| H  | 7.768150000  | 4.218370000 | 8.796340000 |
| H  | 7.694000000  | 0.000000000 | 0.000000000 |
| H  | 7.694000000  | 2.280000000 | 0.000000000 |
| H  | 7.694000000  | 3.847000000 | 0.000000000 |
| H  | 7.694000000  | 6.127000000 | 0.000000000 |
| H  | 11.541000000 | 0.000000000 | 0.000000000 |
| H  | 11.541000000 | 2.280000000 | 0.000000000 |
| H  | 11.541000000 | 3.847000000 | 0.000000000 |
| H  | 11.541000000 | 6.127000000 | 0.000000000 |
| H  | 3.854000000  | 0.000000000 | 0.000000000 |
| H  | 3.854000000  | 2.280000000 | 0.000000000 |
| H  | 3.854000000  | 3.847000000 | 0.000000000 |
| H  | 3.854000000  | 6.127000000 | 0.000000000 |
| H  | 0.014000000  | 0.000000000 | 0.000000000 |
| H  | 0.014000000  | 2.280000000 | 0.000000000 |
| H  | 0.014000000  | 3.847000000 | 0.000000000 |
| H  | 0.014000000  | 6.127000000 | 0.000000000 |
| Si | 11.541000000 | 1.140000000 | 0.930000000 |
| Si | 11.541000000 | 4.987000000 | 0.930000000 |
| Si | 3.854000000  | 1.140000000 | 0.930000000 |
| Si | 3.854000000  | 4.987000000 | 0.930000000 |
| Si | 7.701000000  | 1.140000000 | 0.930000000 |
| Si | 7.701000000  | 4.987000000 | 0.930000000 |
| Si | 0.014000000  | 1.140000000 | 0.930000000 |
| Si | 0.014000000  | 4.987000000 | 0.930000000 |
| Si | 9.621610000  | 1.074770000 | 2.227570000 |
| Si | 9.617570000  | 5.028540000 | 2.217660000 |
| Si | 13.474040000 | 1.126760000 | 2.323460000 |
| Si | 13.459840000 | 4.978390000 | 2.311460000 |
| Si | 9.697380000  | 3.054420000 | 3.414690000 |
| Si | 9.536510000  | 6.895360000 | 3.666410000 |
| Si | 13.450780000 | 3.057270000 | 3.717810000 |
| Si | 13.417770000 | 6.890280000 | 3.735830000 |
| Si | 7.844980000  | 3.057070000 | 4.760230000 |



|    |              |             |             |
|----|--------------|-------------|-------------|
| Si | 7.752160000  | 6.895200000 | 5.306280000 |
| Si | 11.449260000 | 3.010460000 | 4.986180000 |
| Si | 11.423440000 | 6.918280000 | 5.057280000 |
| Si | 8.422260000  | 1.353390000 | 6.260960000 |
| Si | 8.397780000  | 4.740910000 | 6.281330000 |
| Si | 10.832790000 | 1.147360000 | 6.284250000 |
| Si | 10.822960000 | 4.935940000 | 6.202120000 |
| Si | 5.778320000  | 1.103340000 | 2.325530000 |
| Si | 5.774080000  | 5.005930000 | 2.317350000 |
| Si | 5.774950000  | 3.058960000 | 3.661100000 |
| Si | 5.832760000  | 6.892930000 | 3.804590000 |
| Si | 3.809670000  | 3.018560000 | 5.008710000 |
| Si | 3.781480000  | 6.919130000 | 4.998540000 |
| Si | 3.076080000  | 1.120690000 | 6.192200000 |
| Si | 2.776840000  | 4.965130000 | 5.718110000 |
| Si | 1.934880000  | 1.126180000 | 2.209780000 |
| Si | 1.933380000  | 4.968790000 | 2.252240000 |
| Si | 1.918810000  | 3.014250000 | 3.566260000 |
| Si | 1.899210000  | 6.924860000 | 3.556690000 |
| Si | 0.048770000  | 3.147710000 | 5.016370000 |
| Si | 0.035080000  | 6.782590000 | 5.017420000 |
| Si | 0.732020000  | 1.117800000 | 5.848050000 |
| Si | 0.577320000  | 4.964580000 | 6.480680000 |
| Cl | 3.643590000  | 1.128120000 | 8.202430000 |
| Cl | 11.594170000 | 4.899860000 | 8.153290000 |

**[2] Cartesian coordinates and electronic energies of adsorption structures for single and double dechlorination of *iso*-DCE on Si(100)**

**mono- $\sigma^B$  ( E = -161.730232 eV)**

|    |             |             |             |
|----|-------------|-------------|-------------|
| C  | 3.544040000 | 1.018370000 | 8.071410000 |
| C  | 3.205930000 | 1.991070000 | 8.920170000 |
| H  | 2.666870000 | 2.865480000 | 8.552800000 |
| H  | 3.419190000 | 1.946740000 | 9.986740000 |
| H  | 0.000000000 | 0.000000000 | 0.000000000 |
| H  | 0.000000000 | 2.280000000 | 0.000000000 |
| H  | 0.000000000 | 3.847000000 | 0.000000000 |
| H  | 0.000000000 | 6.127000000 | 0.000000000 |
| H  | 3.847000000 | 0.000000000 | 0.000000000 |
| H  | 3.847000000 | 2.280000000 | 0.000000000 |
| H  | 3.847000000 | 3.847000000 | 0.000000000 |
| H  | 3.847000000 | 6.127000000 | 0.000000000 |
| Si | 0.000000000 | 1.140000000 | 0.930000000 |
| Si | 0.000000000 | 4.987000000 | 0.930000000 |

|    |             |             |             |
|----|-------------|-------------|-------------|
| Si | 3.847000000 | 1.140000000 | 0.930000000 |
| Si | 3.847000000 | 4.987000000 | 0.930000000 |
| Si | 1.928460000 | 1.102330000 | 2.192000000 |
| Si | 1.921900000 | 4.947770000 | 2.218310000 |
| Si | 5.771150000 | 1.098880000 | 2.333390000 |
| Si | 5.758620000 | 4.944780000 | 2.319430000 |
| Si | 1.885270000 | 3.005550000 | 3.528340000 |
| Si | 1.884820000 | 6.882030000 | 3.517900000 |
| Si | 5.770030000 | 3.024210000 | 3.745180000 |
| Si | 5.773290000 | 6.849830000 | 3.740170000 |
| Si | 0.084360000 | 3.074390000 | 5.030310000 |
| Si | 0.085600000 | 6.769300000 | 5.023390000 |
| Si | 3.746350000 | 2.945740000 | 5.022540000 |
| Si | 3.743500000 | 6.874860000 | 4.996810000 |
| Si | 0.621850000 | 1.068280000 | 6.158990000 |
| Si | 0.517210000 | 4.923090000 | 6.493920000 |
| Si | 3.047400000 | 1.044420000 | 6.249890000 |
| Si | 2.726790000 | 4.911410000 | 5.765050000 |
| Cl | 7.594060000 | 1.062520000 | 8.117620000 |
| Cl | 4.339880000 | 7.264080000 | 8.658560000 |

**intra dimer tetra- $\sigma_{II}$  ( E = -163.200322 eV)**

|    |             |             |             |
|----|-------------|-------------|-------------|
| C  | 1.910580000 | 1.010670000 | 7.506880000 |
| C  | 1.912080000 | 0.784060000 | 8.821690000 |
| H  | 0.984400000 | 0.678220000 | 9.387650000 |
| H  | 2.843060000 | 0.682440000 | 9.383720000 |
| H  | 0.000000000 | 0.000000000 | 0.000000000 |
| H  | 0.000000000 | 2.280000000 | 0.000000000 |
| H  | 0.000000000 | 3.847000000 | 0.000000000 |
| H  | 0.000000000 | 6.127000000 | 0.000000000 |
| H  | 3.847000000 | 0.000000000 | 0.000000000 |
| H  | 3.847000000 | 2.280000000 | 0.000000000 |
| H  | 3.847000000 | 3.847000000 | 0.000000000 |
| H  | 3.847000000 | 6.127000000 | 0.000000000 |
| Si | 0.000000000 | 1.140000000 | 0.930000000 |
| Si | 0.000000000 | 4.987000000 | 0.930000000 |
| Si | 3.847000000 | 1.140000000 | 0.930000000 |
| Si | 3.847000000 | 4.987000000 | 0.930000000 |
| Si | 1.923120000 | 1.085440000 | 2.235880000 |
| Si | 1.922860000 | 4.937940000 | 2.177950000 |
| Si | 5.766190000 | 1.090550000 | 2.324280000 |
| Si | 5.767870000 | 4.938250000 | 2.307780000 |
| Si | 1.914460000 | 3.039900000 | 3.514720000 |
| Si | 1.916590000 | 6.816690000 | 3.533410000 |

|    |             |             |             |
|----|-------------|-------------|-------------|
| Si | 5.757520000 | 3.018320000 | 3.725210000 |
| Si | 5.755280000 | 6.837170000 | 3.727240000 |
| Si | 0.081410000 | 3.021310000 | 4.983960000 |
| Si | 0.072650000 | 6.791160000 | 4.993610000 |
| Si | 3.739300000 | 3.028660000 | 4.993880000 |
| Si | 3.748210000 | 6.787650000 | 5.009070000 |
| Si | 0.707820000 | 1.057620000 | 6.070390000 |
| Si | 0.682390000 | 4.897700000 | 6.249290000 |
| Si | 3.105850000 | 1.061170000 | 6.067610000 |
| Si | 3.105260000 | 4.897880000 | 6.262890000 |
| Cl | 7.595360000 | 4.845880000 | 8.178940000 |
| Cl | 3.803870000 | 4.839560000 | 8.223370000 |

**di- $\sigma$  ( $I_i$ ) ( E = -160.412511 eV )**

|    |             |              |             |
|----|-------------|--------------|-------------|
| C  | 2.672140000 | 4.964810000  | 8.055730000 |
| C  | 1.119040000 | 4.940540000  | 8.061530000 |
| H  | 0.713040000 | 5.812350000  | 8.586960000 |
| H  | 0.745140000 | 4.034040000  | 8.552700000 |
| H  | 0.000000000 | 0.000000000  | 0.000000000 |
| H  | 0.000000000 | 2.280000000  | 0.000000000 |
| H  | 0.000000000 | 3.847000000  | 0.000000000 |
| H  | 0.000000000 | 6.127000000  | 0.000000000 |
| H  | 3.847000000 | 0.000000000  | 0.000000000 |
| H  | 3.847000000 | 2.280000000  | 0.000000000 |
| H  | 3.847000000 | 3.847000000  | 0.000000000 |
| H  | 3.847000000 | 6.127000000  | 0.000000000 |
| H  | 0.000000000 | 7.701000000  | 0.000000000 |
| H  | 0.000000000 | 9.981000000  | 0.000000000 |
| H  | 3.847000000 | 7.701000000  | 0.000000000 |
| H  | 3.847000000 | 9.981000000  | 0.000000000 |
| H  | 0.000000000 | 11.548000000 | 0.000000000 |
| H  | 0.000000000 | 13.828000000 | 0.000000000 |
| H  | 3.847000000 | 11.548000000 | 0.000000000 |
| H  | 3.847000000 | 13.828000000 | 0.000000000 |
| Si | 0.000000000 | 1.140000000  | 0.930000000 |
| Si | 0.000000000 | 4.987000000  | 0.930000000 |
| Si | 3.847000000 | 1.140000000  | 0.930000000 |
| Si | 3.847000000 | 4.987000000  | 0.930000000 |
| Si | 0.000000000 | 8.820000000  | 0.930000000 |
| Si | 0.000000000 | 12.667000000 | 0.930000000 |
| Si | 3.847000000 | 8.820000000  | 0.930000000 |
| Si | 3.847000000 | 12.667000000 | 0.930000000 |
| Si | 1.921890000 | 1.131070000  | 2.212430000 |

|    |             |              |             |
|----|-------------|--------------|-------------|
| Si | 1.930660000 | 4.965860000  | 2.209990000 |
| Si | 5.767650000 | 1.106020000  | 2.326340000 |
| Si | 5.781830000 | 4.963350000  | 2.339950000 |
| Si | 1.918670000 | 3.046520000  | 3.544820000 |
| Si | 1.918790000 | 6.876210000  | 3.548090000 |
| Si | 5.828590000 | 3.014420000  | 3.739480000 |
| Si | 5.829920000 | 6.904850000  | 3.739480000 |
| Si | 0.125300000 | 2.938670000  | 5.060480000 |
| Si | 0.124630000 | 6.970050000  | 5.063980000 |
| Si | 3.814050000 | 3.029930000  | 5.001580000 |
| Si | 3.817490000 | 6.876440000  | 5.001990000 |
| Si | 0.594320000 | 1.102630000  | 6.534380000 |
| Si | 0.696820000 | 4.953040000  | 6.155560000 |
| Si | 2.815280000 | 1.061320000  | 5.779520000 |
| Si | 3.055980000 | 4.954170000  | 6.113530000 |
| Si | 1.920450000 | 8.798640000  | 2.217010000 |
| Si | 5.767180000 | 8.820170000  | 2.327500000 |
| Si | 1.935760000 | 10.730540000 | 3.540350000 |
| Si | 5.780470000 | 10.730320000 | 3.769640000 |
| Si | 0.104550000 | 10.618320000 | 5.060100000 |
| Si | 3.766340000 | 10.851110000 | 5.067240000 |
| Si | 0.597100000 | 8.802840000  | 6.537800000 |
| Si | 2.818710000 | 8.839950000  | 5.783610000 |
| Si | 1.935390000 | 12.654760000 | 2.206340000 |
| Si | 5.779550000 | 12.651870000 | 2.341910000 |
| Si | 1.933960000 | 14.582390000 | 3.530000000 |
| Si | 5.779430000 | 14.574750000 | 3.762720000 |
| Si | 0.105450000 | 14.679650000 | 5.049580000 |
| Si | 3.764060000 | 14.442570000 | 5.059070000 |
| Si | 1.017510000 | 12.648890000 | 5.779260000 |
| Si | 3.249090000 | 12.650600000 | 6.560620000 |
| Cl | 3.308520000 | 6.460840000  | 8.862230000 |
| Cl | 3.357490000 | 3.520130000  | 8.905850000 |

**intra dimer tetra- $\sigma_1$  ( E = -292.206039 eV)**

|   |             |             |             |
|---|-------------|-------------|-------------|
| C | 1.919290000 | 4.879360000 | 7.520020000 |
| C | 1.910660000 | 4.637730000 | 8.834260000 |
| H | 0.980720000 | 4.530620000 | 9.397360000 |
| H | 2.836820000 | 4.526970000 | 9.403080000 |
| H | 0.000000000 | 0.000000000 | 0.000000000 |
| H | 0.000000000 | 2.280000000 | 0.000000000 |
| H | 0.000000000 | 3.847000000 | 0.000000000 |
| H | 0.000000000 | 6.127000000 | 0.000000000 |
| H | 3.847000000 | 0.000000000 | 0.000000000 |

|    |             |              |             |
|----|-------------|--------------|-------------|
| H  | 3.847000000 | 2.280000000  | 0.000000000 |
| H  | 3.847000000 | 3.847000000  | 0.000000000 |
| H  | 3.847000000 | 6.127000000  | 0.000000000 |
| H  | 0.000000000 | 7.701000000  | 0.000000000 |
| H  | 0.000000000 | 9.981000000  | 0.000000000 |
| H  | 3.847000000 | 7.701000000  | 0.000000000 |
| H  | 3.847000000 | 9.981000000  | 0.000000000 |
| H  | 0.000000000 | 11.548000000 | 0.000000000 |
| H  | 0.000000000 | 13.828000000 | 0.000000000 |
| H  | 3.847000000 | 11.548000000 | 0.000000000 |
| H  | 3.847000000 | 13.828000000 | 0.000000000 |
| Si | 0.000000000 | 1.140000000  | 0.930000000 |
| Si | 0.000000000 | 4.987000000  | 0.930000000 |
| Si | 3.847000000 | 1.140000000  | 0.930000000 |
| Si | 3.847000000 | 4.987000000  | 0.930000000 |
| Si | 0.000000000 | 8.820000000  | 0.930000000 |
| Si | 0.000000000 | 12.667000000 | 0.930000000 |
| Si | 3.847000000 | 8.820000000  | 0.930000000 |
| Si | 3.847000000 | 12.667000000 | 0.930000000 |
| Si | 1.916660000 | 1.117100000  | 2.206100000 |
| Si | 1.925200000 | 4.971780000  | 2.247520000 |
| Si | 5.766260000 | 1.111930000  | 2.325740000 |
| Si | 5.772310000 | 4.972150000  | 2.334690000 |
| Si | 1.927420000 | 3.014870000  | 3.555950000 |
| Si | 1.926160000 | 6.919930000  | 3.561650000 |
| Si | 5.767720000 | 3.028630000  | 3.732530000 |
| Si | 5.767770000 | 6.899130000  | 3.750900000 |
| Si | 0.070370000 | 2.974590000  | 5.026870000 |
| Si | 0.078470000 | 6.945990000  | 5.043520000 |
| Si | 3.767870000 | 2.981330000  | 5.026050000 |
| Si | 3.759140000 | 6.938390000  | 5.040720000 |
| Si | 0.745930000 | 1.088680000  | 6.237950000 |
| Si | 0.683370000 | 4.953000000  | 6.100790000 |
| Si | 3.153500000 | 1.054630000  | 6.232560000 |
| Si | 3.126120000 | 4.952020000  | 6.096380000 |
| Si | 1.916160000 | 8.818750000  | 2.208290000 |
| Si | 5.766210000 | 8.818590000  | 2.333150000 |
| Si | 1.946310000 | 10.724810000 | 3.553990000 |
| Si | 5.735910000 | 10.744430000 | 3.753470000 |
| Si | 0.055600000 | 10.686540000 | 5.022620000 |
| Si | 3.738830000 | 10.830440000 | 5.063510000 |
| Si | 0.744760000 | 8.834200000  | 6.257070000 |
| Si | 3.151900000 | 8.868580000  | 6.243990000 |
| Si | 1.926730000 | 12.659420000 | 2.225820000 |

|    |             |              |             |
|----|-------------|--------------|-------------|
| Si | 5.772950000 | 12.657850000 | 2.326410000 |
| Si | 1.945850000 | 14.595950000 | 3.548530000 |
| Si | 5.734920000 | 14.572150000 | 3.747660000 |
| Si | 0.054640000 | 14.618880000 | 5.015940000 |
| Si | 3.738300000 | 14.480240000 | 5.057440000 |
| Si | 1.060560000 | 12.653630000 | 5.767340000 |
| Si | 3.279950000 | 12.657760000 | 6.528330000 |
| Cl | 3.890220000 | 8.844530000  | 8.202670000 |
| Cl | 3.891120000 | 1.064610000  | 8.193980000 |

**end-bridge ( $I_r$ ) (  $E = -289.773030$  eV )**

|    |              |             |             |
|----|--------------|-------------|-------------|
| C  | 8.114040000  | 3.792150000 | 7.866490000 |
| C  | 7.745900000  | 2.290440000 | 7.791050000 |
| H  | 6.656440000  | 2.218870000 | 7.653580000 |
| H  | 7.989750000  | 1.818990000 | 8.753030000 |
| H  | 7.694000000  | 0.000000000 | 0.000000000 |
| H  | 7.694000000  | 2.280000000 | 0.000000000 |
| H  | 7.694000000  | 3.847000000 | 0.000000000 |
| H  | 7.694000000  | 6.127000000 | 0.000000000 |
| H  | 11.541000000 | 0.000000000 | 0.000000000 |
| H  | 11.541000000 | 2.280000000 | 0.000000000 |
| H  | 11.541000000 | 3.847000000 | 0.000000000 |
| H  | 11.541000000 | 6.127000000 | 0.000000000 |
| H  | 0.000000000  | 0.000000000 | 0.000000000 |
| H  | 0.000000000  | 2.280000000 | 0.000000000 |
| H  | 0.000000000  | 3.847000000 | 0.000000000 |
| H  | 0.000000000  | 6.127000000 | 0.000000000 |
| H  | 3.847000000  | 0.000000000 | 0.000000000 |
| H  | 3.847000000  | 2.280000000 | 0.000000000 |
| H  | 3.847000000  | 3.847000000 | 0.000000000 |
| H  | 3.847000000  | 6.127000000 | 0.000000000 |
| Si | 7.694000000  | 1.140000000 | 0.930000000 |
| Si | 7.694000000  | 4.987000000 | 0.930000000 |
| Si | 11.541000000 | 1.140000000 | 0.930000000 |
| Si | 11.541000000 | 4.987000000 | 0.930000000 |
| Si | 0.000000000  | 1.140000000 | 0.930000000 |
| Si | 0.000000000  | 4.987000000 | 0.930000000 |
| Si | 3.847000000  | 1.140000000 | 0.930000000 |
| Si | 3.847000000  | 4.987000000 | 0.930000000 |
| Si | 9.624380000  | 1.050340000 | 2.228710000 |
| Si | 9.614010000  | 5.004450000 | 2.206740000 |
| Si | 13.478090000 | 1.115800000 | 2.331910000 |
| Si | 13.459520000 | 4.969410000 | 2.332070000 |

|    |              |             |             |
|----|--------------|-------------|-------------|
| Si | 9.680260000  | 3.040250000 | 3.421210000 |
| Si | 9.551250000  | 6.842840000 | 3.682280000 |
| Si | 13.489630000 | 3.038550000 | 3.736290000 |
| Si | 13.461880000 | 6.885910000 | 3.763700000 |
| Si | 7.791120000  | 2.982690000 | 4.737800000 |
| Si | 7.726050000  | 6.942320000 | 5.268120000 |
| Si | 11.475080000 | 2.890130000 | 4.984060000 |
| Si | 11.468090000 | 7.013740000 | 5.098540000 |
| Si | 8.522750000  | 1.340090000 | 6.266010000 |
| Si | 8.346540000  | 4.761530000 | 6.139930000 |
| Si | 10.948300000 | 1.159750000 | 6.544500000 |
| Si | 10.702040000 | 4.929490000 | 5.771790000 |
| Si | 1.932040000  | 1.121810000 | 2.204700000 |
| Si | 1.915000000  | 4.966270000 | 2.205080000 |
| Si | 5.763470000  | 1.090020000 | 2.314030000 |
| Si | 5.759830000  | 4.993510000 | 2.338600000 |
| Si | 1.924390000  | 3.041440000 | 3.535150000 |
| Si | 1.914950000  | 6.889300000 | 3.529770000 |
| Si | 5.711050000  | 3.023800000 | 3.668310000 |
| Si | 5.777540000  | 6.901530000 | 3.812120000 |
| Si | 0.097460000  | 3.143550000 | 5.051940000 |
| Si | 0.089940000  | 6.765900000 | 5.054660000 |
| Si | 3.756270000  | 2.909030000 | 5.049690000 |
| Si | 3.737720000  | 6.994270000 | 5.045930000 |
| Si | 0.998630000  | 1.105720000 | 5.777680000 |
| Si | 0.622140000  | 4.952940000 | 6.540810000 |
| Si | 3.234750000  | 1.102650000 | 6.546860000 |
| Si | 2.853960000  | 4.949590000 | 5.767650000 |
| Cl | 6.833430000  | 4.665310000 | 8.830840000 |
| Cl | 9.701670000  | 3.954440000 | 8.761020000 |

**inter dimer tetra- $\sigma_1$  ( E = -291.667115 eV)**

|   |              |             |             |
|---|--------------|-------------|-------------|
| C | 8.248450000  | 2.984620000 | 7.542600000 |
| C | 8.200680000  | 2.955920000 | 8.879600000 |
| H | 8.187730000  | 2.020390000 | 9.443010000 |
| H | 8.176450000  | 3.870770000 | 9.474380000 |
| H | 7.694000000  | 0.000000000 | 0.000000000 |
| H | 7.694000000  | 2.280000000 | 0.000000000 |
| H | 7.694000000  | 3.847000000 | 0.000000000 |
| H | 7.694000000  | 6.127000000 | 0.000000000 |
| H | 11.541000000 | 0.000000000 | 0.000000000 |
| H | 11.541000000 | 2.280000000 | 0.000000000 |
| H | 11.541000000 | 3.847000000 | 0.000000000 |
| H | 11.541000000 | 6.127000000 | 0.000000000 |

|    |              |             |             |
|----|--------------|-------------|-------------|
| H  | 0.000000000  | 0.000000000 | 0.000000000 |
| H  | 0.000000000  | 2.280000000 | 0.000000000 |
| H  | 0.000000000  | 3.847000000 | 0.000000000 |
| H  | 0.000000000  | 6.127000000 | 0.000000000 |
| H  | 3.847000000  | 0.000000000 | 0.000000000 |
| H  | 3.847000000  | 2.280000000 | 0.000000000 |
| H  | 3.847000000  | 3.847000000 | 0.000000000 |
| H  | 3.847000000  | 6.127000000 | 0.000000000 |
| Si | 7.694000000  | 1.140000000 | 0.930000000 |
| Si | 7.694000000  | 4.987000000 | 0.930000000 |
| Si | 11.541000000 | 1.140000000 | 0.930000000 |
| Si | 11.541000000 | 4.987000000 | 0.930000000 |
| Si | 0.000000000  | 1.140000000 | 0.930000000 |
| Si | 0.000000000  | 4.987000000 | 0.930000000 |
| Si | 3.847000000  | 1.140000000 | 0.930000000 |
| Si | 3.847000000  | 4.987000000 | 0.930000000 |
| Si | 9.618800000  | 1.054110000 | 2.217940000 |
| Si | 9.619110000  | 5.042600000 | 2.222860000 |
| Si | 13.473450000 | 1.105310000 | 2.324880000 |
| Si | 13.468830000 | 4.965070000 | 2.312020000 |
| Si | 9.708500000  | 3.044010000 | 3.387050000 |
| Si | 9.502400000  | 6.907270000 | 3.724990000 |
| Si | 13.561860000 | 3.036530000 | 3.703240000 |
| Si | 13.502140000 | 6.868460000 | 3.747860000 |
| Si | 7.776460000  | 3.031660000 | 4.622580000 |
| Si | 7.701880000  | 6.856790000 | 5.401830000 |
| Si | 11.540770000 | 3.043080000 | 4.911280000 |
| Si | 11.480870000 | 6.803430000 | 5.039590000 |
| Si | 8.362920000  | 1.472200000 | 6.263730000 |
| Si | 8.397840000  | 4.526750000 | 6.295550000 |
| Si | 10.692870000 | 1.123820000 | 5.878730000 |
| Si | 10.792410000 | 4.854130000 | 6.216890000 |
| Si | 1.929610000  | 1.117720000 | 2.225880000 |
| Si | 1.916290000  | 4.959560000 | 2.207150000 |
| Si | 5.768160000  | 1.075090000 | 2.327010000 |
| Si | 5.760300000  | 5.004090000 | 2.336770000 |
| Si | 1.959170000  | 3.045190000 | 3.541920000 |
| Si | 1.940030000  | 6.872450000 | 3.535470000 |
| Si | 5.666540000  | 3.031300000 | 3.644620000 |
| Si | 5.766850000  | 6.884640000 | 3.858390000 |
| Si | 0.131100000  | 3.134870000 | 5.053410000 |
| Si | 0.111280000  | 6.748020000 | 5.058380000 |
| Si | 3.742770000  | 2.971590000 | 5.058700000 |
| Si | 3.714920000  | 6.924970000 | 5.058130000 |



|    |              |             |             |
|----|--------------|-------------|-------------|
| Si | 1.024430000  | 1.091690000 | 5.741230000 |
| Si | 0.689930000  | 4.938880000 | 6.487590000 |
| Si | 3.245870000  | 1.100320000 | 6.453860000 |
| Si | 3.122660000  | 4.944910000 | 6.216720000 |
| Cl | 4.009120000  | 4.933240000 | 8.128660000 |
| Cl | 11.560280000 | 4.851880000 | 8.163890000 |

**inter dimer tetra- $\sigma_{II}$  ( E = -162.721577 eV )**

|    |              |             |             |
|----|--------------|-------------|-------------|
| C  | 3.307830000  | 3.011110000 | 7.517700000 |
| C  | 3.376850000  | 2.997760000 | 8.853460000 |
| H  | 3.399810000  | 2.066000000 | 9.421940000 |
| H  | 3.403030000  | 3.917230000 | 9.441050000 |
| H  | 0.000000000  | 0.000000000 | 0.000000000 |
| H  | 0.000000000  | 2.280000000 | 0.000000000 |
| H  | 0.000000000  | 3.847000000 | 0.000000000 |
| H  | 0.000000000  | 6.127000000 | 0.000000000 |
| H  | 3.847000000  | 0.000000000 | 0.000000000 |
| H  | 3.847000000  | 2.280000000 | 0.000000000 |
| H  | 3.847000000  | 3.847000000 | 0.000000000 |
| H  | 3.847000000  | 6.127000000 | 0.000000000 |
| Si | 0.000000000  | 1.140000000 | 0.930000000 |
| Si | 0.000000000  | 4.987000000 | 0.930000000 |
| Si | 3.847000000  | 1.140000000 | 0.930000000 |
| Si | 3.847000000  | 4.987000000 | 0.930000000 |
| Si | 1.921340000  | 1.048770000 | 2.214300000 |
| Si | 1.921160000  | 5.030050000 | 2.214470000 |
| Si | 5.770730000  | 1.069570000 | 2.318880000 |
| Si | 5.769900000  | 5.013790000 | 2.320090000 |
| Si | 1.779140000  | 3.037180000 | 3.374950000 |
| Si | 2.035770000  | 6.881550000 | 3.688750000 |
| Si | 5.776880000  | 3.037610000 | 3.603220000 |
| Si | 5.744670000  | 6.883220000 | 3.854760000 |
| Si | 0.019920000  | 3.026010000 | 4.953500000 |
| Si | 0.126320000  | 6.869310000 | 5.038940000 |
| Si | 3.692790000  | 3.026380000 | 4.615840000 |
| Si | 3.807310000  | 6.872380000 | 5.394420000 |
| Si | 0.713080000  | 1.145150000 | 6.194380000 |
| Si | 0.717500000  | 4.895870000 | 6.200480000 |
| Si | 3.109100000  | 1.490160000 | 6.264380000 |
| Si | 3.112890000  | 4.546420000 | 6.275790000 |
| Cl | -0.049770000 | 4.890550000 | 8.144930000 |
| Cl | -0.046140000 | 1.130460000 | 8.141750000 |

[3] Imaginary vibrational frequencies of the transition states along single and double dechlorination processes of *trans* and iso-DCE dissociation on Si(100) are shown in Figure S1 and S2

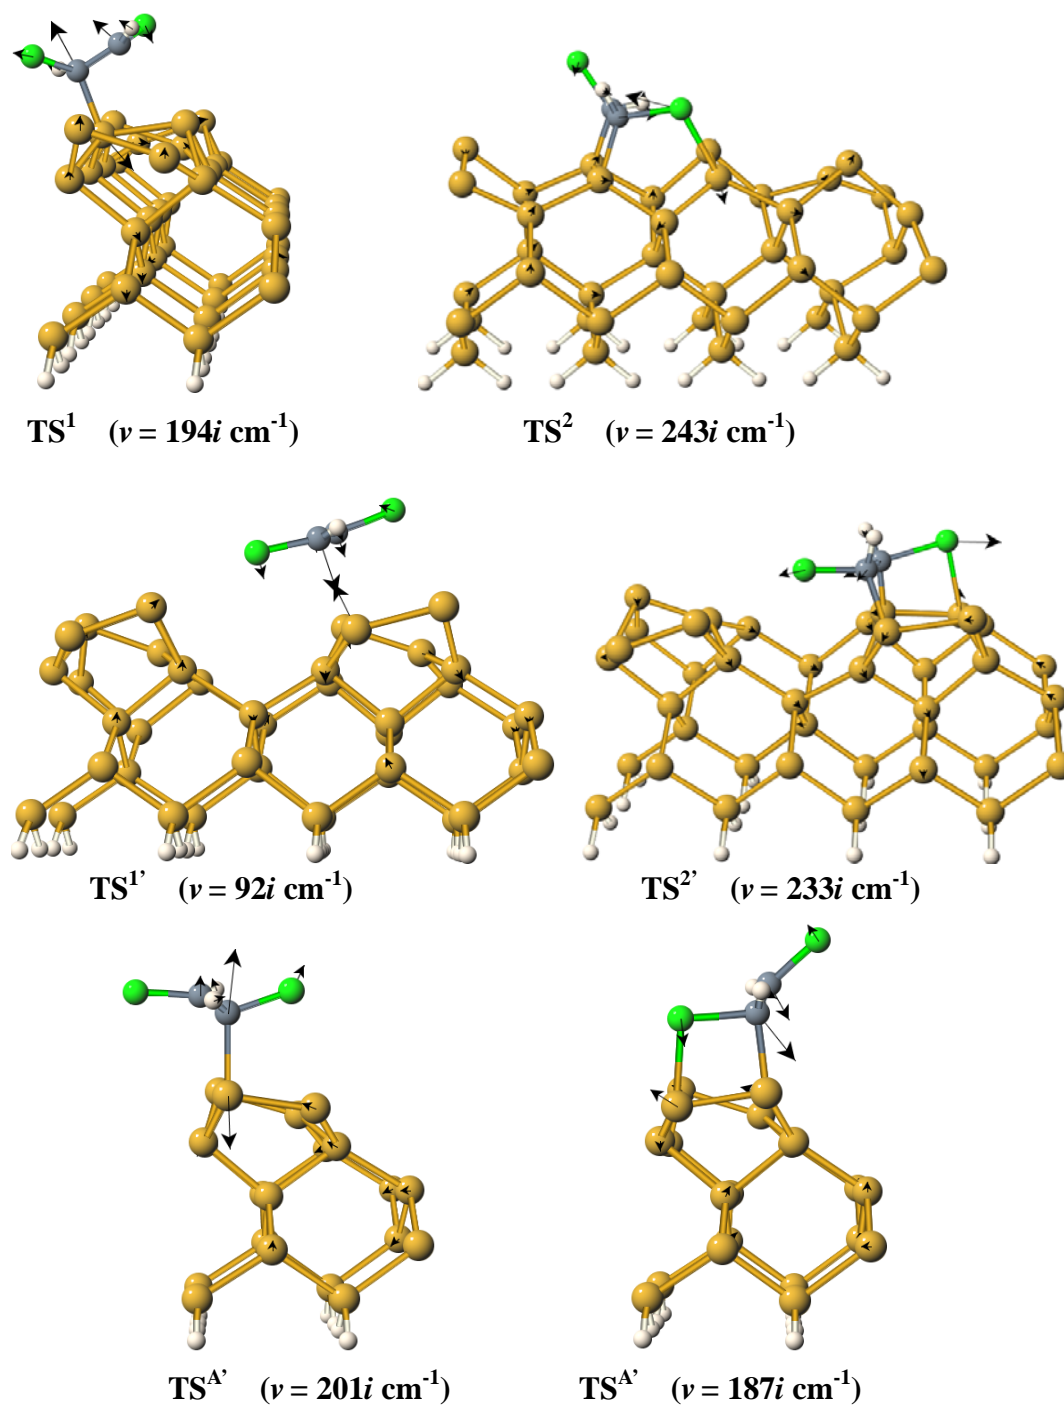

**Figure S1** The vibrational mode of imaginary frequency in each transition state along the reaction pathways of *trans*-DCE dechlorination on Si(100) plotted in Figure 2.

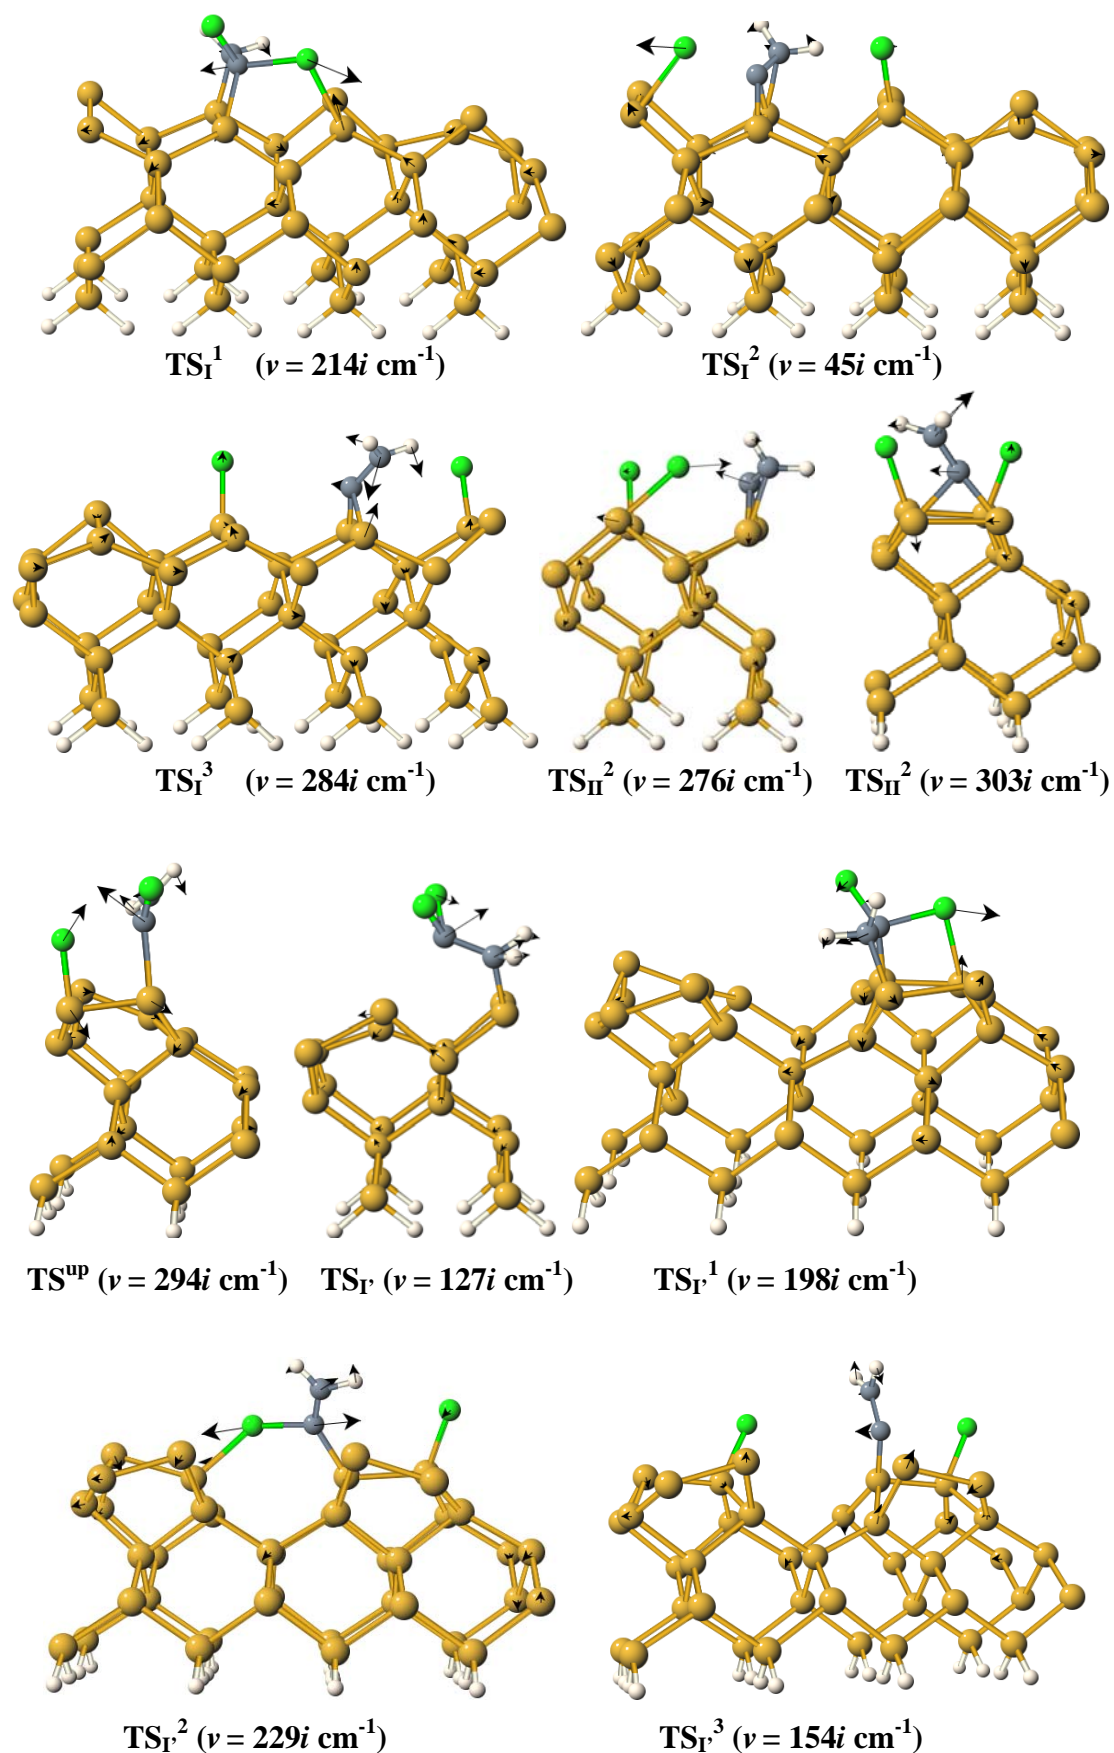

**Figure S2** The vibrational mode of imaginary frequency in each transition state along the reaction pathways I, II and I' of *iso*-DCE dechlorination on Si(100) plotted in Figures 4 and 5.
